# Supplementary material for: Semantic prioritization of novel causative genomic variants
Source: PubMed Central journal article supplement (PMC5411092; doi:10.1371/journal.pcbi.1005500), 2017-04-17
Supplement: pcbi.1005500.s002.pdf [file pcbi.1005500.s002.pdf]

## S2 Table

|           | Precision | Recall | F-measure | ROC AUC |
|-----------|-----------|--------|-----------|---------|
| PVP       | 0.963     | 0.963  | 0.963     | 0.994   |
| PVP-Model | 0.894     | 0.893  | 0.893     | 0.963   |
| PVP-Human | 0.96      | 0.96   | 0.96      | 0.96    |

Stratified cross-validation results when training our models on 80% of ClinVar pathogenic variants.
