# Supplementary material for: Semantic prioritization of novel causative genomic variants
Source: PubMed Central journal article supplement (PMC5411092; doi:10.1371/journal.pcbi.1005500), 2017-04-17
Supplement: pcbi.1005500.s003.pdf [file pcbi.1005500.s003.pdf]

S3 Table

| <b>Randomly added phenotypes (8522 total)</b>                                   |             |               |
|---------------------------------------------------------------------------------|-------------|---------------|
| <b>Top rank</b>                                                                 | <b>3547</b> | <b>41.62%</b> |
| <b>Top 10</b>                                                                   | <b>4315</b> | <b>50.63%</b> |
| <b>Randomly removed phenotypes (8522 total) with <math>p=\frac{1}{3}</math></b> |             |               |
| <b>Top rank</b>                                                                 | <b>3963</b> | <b>46.50%</b> |
| <b>Top 10</b>                                                                   | <b>4921</b> | <b>57.74%</b> |
| <b>Double pathogenic variants on D1 (8522 total)</b>                            |             |               |
| <b>Top rank</b>                                                                 | <b>5316</b> | <b>62.38%</b> |
| <b>Top 10</b>                                                                   | <b>7602</b> | <b>89.20%</b> |
| <b>Double pathogenic variants on D2 (8522 total)</b>                            |             |               |
| <b>Top rank</b>                                                                 | <b>1309</b> | <b>15.36%</b> |
| <b>Top 10</b>                                                                   | <b>3612</b> | <b>42.38%</b> |
| <b>Double pathogenic variants on both (8522 total)</b>                          |             |               |
| <b>D1 Variant</b>                                                               |             |               |
| <b>Top rank</b>                                                                 | <b>3116</b> | <b>36.56%</b> |
| <b>Top 10</b>                                                                   | <b>5428</b> | <b>63.69%</b> |
| <b>D2 Variant</b>                                                               |             |               |
| <b>Top rank</b>                                                                 | <b>3171</b> | <b>37.21%</b> |
| <b>Top 10</b>                                                                   | <b>5468</b> | <b>64.16%</b> |

Experiments when adding noise to phenotypes associated with 8,522 synthetic whole exome sequences. Each WES contains a single causative variant  $v_1$  and is associated with phenotypes  $P_1$ . First, we randomly add the complete set of phenotypes from a randomly chosen disease to  $P_1$  and record how well we recover  $v_1$ . Second, we randomly remove each phenotype in  $P_1$  with a probability of  $\frac{1}{3}$  and record how well  $v_1$  is recovered. In the third experiment, we add another causative variant  $v_2$  to the WES (which is causative for the disease that is phenotypically most similar to  $P_1$ , and is itself associated with phenotypes  $P_2$ ), and use  $P_1$  to recover  $v_1$ . We record how often we identify  $v_1$  and  $v_2$  at the first or top 10 ranks. Finally, we perform the same experiment using as phenotypes  $P_1 \cup P_2$ .
