# Supplementary material for: Semantic prioritization of novel causative genomic variants
Source: PubMed Central journal article supplement (PMC5411092; doi:10.1371/journal.pcbi.1005500), 2017-04-17
Supplement: pcbi.1005500.s004.pdf [file pcbi.1005500.s004.pdf]

## S4 Table

| Sample                          | Phenotype | Rank | Zygosity | Gene   | SIFT prediction | Polyphen prediction |
|---------------------------------|-----------|------|----------|--------|-----------------|---------------------|
| UK10K_THY5003269.REL-2013-04-20 | DG        | 1    | 0/1      | PROP1  | D               | B                   |
|                                 |           | 2    | 0/1      | LHX3   | D               | D                   |
|                                 |           | 5    | 0/1      | LHX4   | D               | P                   |
| UK10K_THY5003270.REL-2013-04-20 | DG        | 1    | 0/1      | NKX2-1 | T               | P                   |
|                                 |           | 7    | 0/1      | GLIS3  | T               | P                   |
|                                 |           | 8    | 0/1      | TPO    | D               | D                   |
| UK10K_THY5003272.REL-2013-04-20 | DG        | 1    | 0/1      | LHX3   | D               | D                   |
|                                 |           | 3    | 0/1      | NKX2-1 | T               | D                   |
| UK10K_THY5003273.REL-2013-04-20 | DG        | 1    | 0/1      | NKX2-1 | T               | B                   |
|                                 |           | 8    | 0/1      | PAX8   | D               | D                   |
| UK10K_THY5068934.REL-2013-04-20 | GIS       | 5    | 0/1      | TG     | T               | .                   |
| UK10K_THY5159470.REL-2013-04-20 | DG        | 4    | 0/1      | PAX8   | D               | D                   |
| UK10K_THY5159478.REL-2013-04-20 | DG        | 1    | 0/1      | NKX2-1 | T               | P                   |
|                                 |           | 3    | 0/1      | TPO    | T               | D                   |
| UK10K_THY5159472.REL-2013-04-20 | DG        | 1    | 0/1      | NKX2-1 | T               | D                   |
|                                 |           | 2    | 0/1      | TG     | D               | D                   |
|                                 |           | 3    | 0/1      | LHX3   | D               | P                   |
|                                 |           | 6    | 0/1      | PAX8   | D               | D                   |
| UK10K_THY5159467.REL-2013-04-20 | GIS       | 2    | 0/1      | NKX2-1 | T               | D                   |
|                                 |           | 6    | 0/1      | PAX8   | D               | D                   |
| UK10K_THY5236178.REL-2013-04-20 | GIS       | 1    | 0/1      | TG     | D               | D                   |
|                                 |           | 3    | 0/1      | TG     | D               | B                   |
|                                 |           | 9    | 1/1      | DUOX2  | D               | D                   |
| UK10K_THY5236182.REL-2013-04-20 | GIS       | 1    | 0/1      | LHX3   | T               | D                   |
| UK10K_THY5298762.REL-2013-04-20 | CCH       | 1    | 0/1      | NKX2-1 | T               | CCH                 |
|                                 |           | 3    | 0/1      | TG     | T               | P                   |
| UK10K_THY5298765.REL-2013-04-20 | GIS       | 4    | 1/1      | TPO    | D               | D                   |
| UK10K_THY5298766.REL-2013-04-20 | GIS       | 3    | 0/1      | TPO    | D               | D                   |
| UK10K_THY5298767.REL-2013-04-20 | GIS       | 4    | 1/1      | TPO    | D               | D                   |
|                                 |           | 5    | 0/1      | PAX8   | T               | D                   |
| UK10K_THY5298777.REL-2013-04-20 | DG        | 1    | 0/1      | GLIS3  | T               | D                   |
|                                 |           | 6    | 0/1      | PAX8   | D               | D                   |
| UK10K_THY5298778.REL-2013-04-20 | DG        | 1    | 0/1      | GLIS3  | T               | D                   |
|                                 |           | 2    | 0/1      | NKX2-1 | T               | D                   |
|                                 |           | 4    | 0/1      | TG     | T               | P                   |
| UK10K_THY5298780.REL-2013-04-20 | GIS       | 1    | 0/1      | NKX2-1 | T               | P                   |
|                                 |           | 2    | 0/1      | NKX2-1 | T               | D                   |
|                                 |           | 8    | 0/1      | PAX8   | D               | D                   |
| UK10K_THY5329043.REL-2013-04-20 | CCH       | 1    | 0/1      | NKX2-1 | T               | D                   |
| UK10K_THY5329044.REL-2013-04-20 | GIS       | 1    | 0/1      | TG     | T               | P                   |
|                                 |           | 4    | 0/1      | LHX3   | T               | D                   |
| UK10K_THY5329047.REL-2013-04-20 | GIS       | 1    | 0/1      | NKX2-1 | T               | D                   |
|                                 |           | 5    | 1/1      | TG     | T               | D                   |
| UK10K_THY5329049.REL-2013-04-20 | GIS       | 1    | 0/1      | NKX2-1 | T               | D                   |
| UK10K_THY5329050.REL-2013-04-20 | GIS       | 1    | 0/1      | NKX2-1 | T               | B                   |
| UK10K_THY5329051.REL-2013-04-20 | GIS       | 5    | 0/1      | PAX8   | D               | D                   |
| UK10K_THY5329052.REL-2013-04-20 | GIS       | 1    | 0/1      | NKX2-1 | T               | P                   |
|                                 |           | 2    | 0/1      | NKX2-1 | T               | D                   |
| UK10K_THY5329053.REL-2013-04-20 | GIS       | 1    | 1/1      | TG     | D               | D                   |
|                                 |           | 2    | 0/1      | TPO    | D               | P                   |
|                                 |           | 3    | 0/1      | DUOX2  | D               | D                   |
|                                 |           | 5    | 0/1      | PAX8   | T               | .                   |
|                                 |           | 6    | 0/1      | DUOX2  | T               | .                   |
| UK10K_THY5329054.REL-2013-04-20 | GIS       | 1    | 1/1      | TG     | D               | D                   |
|                                 |           | 2    | 0/1      | DUOX2  | D               | D                   |
|                                 |           | 3    | 0/1      | DUOX2  | T               | .                   |
| UK10K_THY5329055.REL-2013-04-20 | GIS       | 1    | 1/1      | TG     | T               | .                   |
|                                 |           | 7    | 0/1      | PAX8   | D               | D                   |
| UK10K_THY5329056.REL-2013-04-20 | GIS       | 1    | 0/1      | NKX2-1 | T               | D                   |
|                                 |           | 3    | 1/1      | TG     | T               | D                   |
|                                 |           | 5    | 0/1      | LHX3   | D               | P                   |
| UK10K_THY5329058.REL-2013-04-20 | GIS       | 1    | 0/1      | NKX2-1 | T               | P                   |
|                                 |           | 2    | 0/1      | NKX2-1 | T               | D                   |
| UK10K_THY5329059.REL-2013-04-20 | GIS       | 1    | 1/1      | TG     | D               | D                   |
|                                 |           | 2    | 0/1      | NKX2-1 | T               | D                   |
|                                 |           | 3    | 1/1      | TG     | .               | D                   |
| UK10K_THY5329060.REL-2013-04-20 | GIS       | 1    | 1/1      | TG     | D               | D                   |
|                                 |           | 2    | 1/1      | TG     | D               | D                   |
|                                 |           | 3    | 0/1      | DUOX2  | D               | D                   |
|                                 |           | 4    | 0/1      | DUOX2  | T               | .                   |
| UK10K_THY5329061.REL-2013-04-20 | GIS       | 1    | 1/1      | TG     | D               | D                   |
|                                 |           | 2    | 0/1      | DUOX2  | T               | .                   |
|                                 |           | 5    | 0/1      | DUOX2  | D               | P                   |
| UK10K_THY5329062.REL-2013-04-20 | GIS       | 1    | 1/1      | TG     | D               | D                   |
|                                 |           | 2    | 0/1      | PAX8   | T               | D                   |
|                                 |           | 3    | 0/1      | DUOX2  | D               | P                   |
|                                 |           | 10   | 0/1      | LHX3   | T               | B                   |
| UK10K_THY5329068.REL-2013-04-20 | GIS       | 3    | 0/1      | GLIS3  | T               | P                   |
| UK10K_THY5370898.REL-2013-04-20 | GIS       | 1    | 0/1      | GLIS3  | T               | B                   |
|                                 |           | 3    | 1/1      | TG     | .               | D                   |
|                                 |           | 10   | 0/1      | PAX8   | D               | D                   |

The table shows the 36 cases from UK10K dataset diagnosed with Congenital hypothyroidism which show genes already implicated in the disease within the top 20 hits. Patients are broadly stratified into three groups: CCH, central congenital hypothyroidism; GIS, patients with gland-in-situ and no anatomical signs of dysplasia which include likely dysmorphogenesis; DG, thyroid dysgenesis. Heterozygous state; 0/1, homozygous state 1/1. SIFT categories T and D correspond to Deleterious (sift score  $\leq 0.05$ ), and Tolerated (sift score  $> 0.05$ ). Polyphen categories: D; Probably damaging (polyphen score  $\geq 0.909$ ), P; possibly damaging (0.447 to 0.909) B; benign (polyphen score  $\leq 0.446$ ).
