# Supplementary material for: Semantic prioritization of novel causative genomic variants
Source: PubMed Central journal article supplement (PMC5411092; doi:10.1371/journal.pcbi.1005500), 2017-04-17
Supplement: pcbi.1005500.s005.pdf [file pcbi.1005500.s005.pdf]

S5 Table

| ID                | Phenotype | Variant(s)                      | PVP      | PVP-Human   | PVP-Model   | eXteasy  | Phevor       | Exomiser             | CADD          | GWAVA               | DANN            |
|-------------------|-----------|---------------------------------|----------|-------------|-------------|----------|--------------|----------------------|---------------|---------------------|-----------------|
| UK10K..THY5329055 | GIS       | TG:c.1583C>A (hom)              | 1        | 1           | 1           | 2        | 209          | 5                    | 500           | 13,522              | 1,866           |
| UK10K..THY5329056 | GIS       | TG:c.1583C>A (hom)              | 2        | 1           | 1           | 4        | 103          | 9                    | 495           | 13,763              | 1,904           |
| UK10K..THY5329059 | GIS       | TG:c.2177C>A (hom)              | 3; 2     | 1; 3        | 1; 2        | 2; 9     | 223          | 23; 26               | 680; 554      | 6,929; 3,108        | 493; 1,377      |
| UK10K..THY5329060 | GIS       | TG:c.3149C>T (hom)              | 4; 3; 1  | 1; 2; 3     | 1; 2; 8     | 1; 7; 43 | 209; 268     | 3; 7; 4,327          | 661; 533; 73  | 6,874; 3,078; 4,632 | 488; 1,296; 315 |
| UK10K..THY5370898 | GIS       | DUOX2:c.2056C>T (het)           | 3        | 524         | 8,031       | -        | 92           | 13,851               | 4,700         | 3,130               | 3,707           |
| UK10K..THY5329047 | GIS       | TG:c.638+5G>A (hom)             | 6        | 457         | 5,616       | -        | 103          | 11,624               | 4,041         | 2,366               | 3,238           |
| UK10K..THY5329053 | GIS       | TG:c.4478C>A (hom)              | 5; 2     | 2; 3        | 1; 5        | 9; 38    | 125; 304     | 12; 3,946            | 605; 74       | 13,624; 4,596       | 921; 297        |
| UK10K..THY5329054 | GIS       | DUOX2:c.2056C>T (het)           | 3; 1     | 1; 2        | 1; 5        | 11; 46   | 127; 285     | 29; 3,940            | 617; 69       | 13,408; 4,569       | 887; 312        |
| UK10K..THY5329061 | GIS       | DUOX2:c.2056C>T (het)           | 2; 1     | 1; 2        | 1; 5        | 8; 17    | 74; 106      | 40; 4,275            | 375; 192      | 14,222; 4,748       | 1,305; 114      |
| UK10K..THY5329062 | GIS       | DUOX2:c.1060C>T (het)           | 4; 3     | 2; 3        | 1; 5        | 8; 14    | 220; 288     | 46; 6,184            | 348; 177      | 13,969; 4,667       | 1,322; 107      |
| UK10K..THY5236178 | GIS       | DUOX2:c.1060C>T (het)           | 5; 1; 11 | 21; 15; 163 | 94; 13; 172 | 13; 3; 1 | 116; 116; 64 | 1,427; 1,447; 53,947 | 833; 675; 871 | 1,311; 1,717; 3,455 | 996; 889; 867   |
| UK10K..THY5329044 | GIS       | TG:c.7640T>A (het)              | 1        | 1           | 1           | 1        | 209          | 62                   | 90            | 7,072               | 381             |
| UK10K..THY5068932 | GIS       | TG:c.2311C>T (het)              | 8        | 3           | 43          | -        | 246          | 21,654               | 1,731         | 19,169              | 1,885           |
| UK10K..THY5068934 | GIS       | TG:c.3438+3_3433+6delGAGT (het) | 10       | 5           | 41          | -        | 202          | 21,086               | 1,688         | 19,091              | 1,857           |
| UK10K..THY5068933 | GIS       | TG:c.3438+3_3433+6delGAGT (het) | -        | -           | -           | -        | -            | -                    | -             | -                   | -               |

Results of variant and gene prioritization methods for a subset of UK10K rare thyroid dataset (EGAS00001000131) with confirmed disease-associated mutations. In cases THY5329044, THY5068932, THY5068933, and THY5068934, the variants were considered to contribute to but not entirely explain the whole phenotype observed [1].

## References

- [1] Nicholas A, Serra E, Cangul H, Alyaarubi S, Ullah I, Schoenmakers E, et al. Comprehensive screening of eight known causative genes in congenital hypothyroidism with gland-in-situ. *The Journal of Clinical Endocrinology & Metabolism*. 0;0(0):jc.2016–1879. doi:10.1210/jc.2016-1879.
