# Supplementary material for: Semantic prioritization of novel causative genomic variants
Source: PubMed Central journal article supplement (PMC5411092; doi:10.1371/journal.pcbi.1005500), 2017-04-17
Supplement: pcbi.1005500.s006.pdf [file pcbi.1005500.s006.pdf]

## S6 Table

| Chr | Start     | RSID        | Gene   | Source     | OMIM   | PVP-MOD | PVP-Human |
|-----|-----------|-------------|--------|------------|--------|---------|-----------|
| 10  | 60150616  | rs757075712 | TFAM   | mouse      | 617156 | 1465    | 1413      |
| 5   | 484635    | rs869312806 | SLC9A3 | mouse-fish | 616868 | 340     | 93        |
| 5   | 483385    | rs766076524 | SLC9A3 | mouse-fish | 616868 | 273     | 49        |
| 5   | 484762    | rs869312807 | SLC9A3 | mouse-fish | 616868 | 249     | 53        |
| 20  | 36031750  | rs879255268 | SRC    | mouse      | 616937 | 495     | 95        |
| 5   | 121409850 | rs876657852 | LOX    | mouse-fish | 617168 | 233     | 139       |
| 6   | 33756856  | rs878852983 | LEMD2  | mouse      | 212500 | 34      | 5         |
| 2   | 27278096  | rs879253768 | AGBL5  | fish       | 617023 | 6       | 3         |
| 2   | 27278039  | rs879253769 | AGBL5  | fish       | 617023 | 417     | 97        |
| 22  | 19486647  | rs754080445 | CDC45  | mouse      | 617063 | 327     | 379       |
| 22  | 19470326  | rs745800041 | CDC45  | mouse      | 617063 | 919     | 994       |
| 22  | 19470234  | rs879255632 | CDC45  | mouse      | 617063 | 39      | 306       |
| 22  | 19471511  | rs540217942 | CDC45  | mouse      | 617063 | 148     | 218       |
| 22  | 19506390  | rs778665661 | CDC45  | mouse      | 617063 | 238     | 39        |
| 22  | 19468567  | rs879255633 | CDC45  | mouse      | 617063 | 18      | 274       |
| 22  | 19470341  | rs748749078 | CDC45  | mouse      | 617063 | 1831    | 1840      |
| 22  | 19494977  | rs146559223 | CDC45  | mouse      | 617063 | 632     | 667       |
| 3   | 154834337 | rs879255651 | MME    | mouse      | 617018 | 20      | 79        |
| 3   | 132394747 | rs114925667 | UBA5   | mouse      | 617132 | 550     | 83        |
| 3   | 132384669 | rs774318611 | UBA5   | mouse      | 617132 | 1       | 3         |
| 3   | 132394134 | rs745968949 | UBA5   | mouse      | 617132 | 3       | 6         |
| 3   | 132384686 | rs886039756 | UBA5   | mouse      | 617132 | 521     | 213       |
| 3   | 132389876 | rs374052333 | UBA5   | mouse      | 617132 | 91      | 41        |
| 3   | 132394183 | rs886039757 | UBA5   | mouse      | 617132 | 60      | 19        |
| 3   | 132390987 | rs886039759 | UBA5   | mouse      | 617132 | 8       | 8         |
| 3   | 132395320 | rs886039760 | UBA5   | mouse      | 617132 | 783     | 566       |
| 3   | 132389817 | rs886039761 | UBA5   | mouse      | 617132 | 264     | 84        |
| 3   | 132384674 | rs532178791 | UBA5   | mouse      | 617132 | 1139    | 1035      |
| 16  | 68381533  | rs886039897 | PRMT7  | mouse      | 617157 | 701     | 446       |
| 16  | 68386217  | rs751670999 | PRMT7  | mouse      | 617157 | 68      | 54        |
| 16  | 68349977  | rs149170494 | PRMT7  | mouse      | 617157 | 73      | 51        |
| 16  | 68380151  | rs762515973 | PRMT7  | mouse      | 617157 | 439     | 336       |
| 16  | 68380047  | rs201824659 | PRMT7  | mouse      | 617157 | 480     | 570       |

|    |           |             |        |            |        |     |     |
|----|-----------|-------------|--------|------------|--------|-----|-----|
| 3  | 192053223 | rs886039903 | FGF12  | mouse      | 617166 | 14  | 71  |
| 12 | 6690297   | rs201992075 | CHD4   | mouse      | 617159 | 296 | 605 |
| 12 | 6700879   | rs886039915 | CHD4   | mouse      | 617159 | 633 | 182 |
| 12 | 6702357   | rs886039916 | CHD4   | mouse      | 617159 | 3   | 26  |
| 12 | 6697549   | rs886039917 | CHD4   | mouse      | 617159 | 83  | 43  |
| 12 | 6697063   | rs886039918 | CHD4   | mouse      | 617159 | 200 | 78  |
| 12 | 6697486   | rs886039919 | CHD4   | mouse      | 617159 | 596 | 368 |
| X  | 24082345  | rs886040855 | EIF2S3 | fish       | 300987 | 365 | 169 |
| X  | 24084119  | rs886040856 | EIF2S3 | fish       | 300987 | 496 | 642 |
| 11 | 118452217 | rs886040859 | ARCN1  | mouse      | 617164 | 62  | 14  |
| 19 | 48922979  | rs886040861 | GRIN2D | mouse      | 617162 | 14  | 18  |
| 5  | 121411138 | rs886040965 | LOX    | mouse-fish | 617168 | 53  | 110 |
| 5  | 121413556 | rs886040966 | LOX    | mouse-fish | 617168 | 533 | 152 |
| 5  | 121411177 | rs886040967 | LOX    | mouse-fish | 617168 | 440 | 283 |
| 18 | 56033433  | rs879255599 | NEDD4L | mouse      | 617201 | 93  | 36  |
| 18 | 56034996  | rs879255598 | NEDD4L | mouse      | 617201 | 26  | 21  |
| 18 | 56057899  | rs879255597 | NEDD4L | mouse      | 617201 | 1   | 14  |
| 18 | 56057912  | rs879255596 | NEDD4L | mouse      | 617201 | 40  | 81  |
| 3  | 132390945 | rs540839115 | UBA5   | mouse      | 617133 | 535 | 141 |
| 3  | 132394207 | rs886039762 | UBA5   | mouse      | 617133 | 825 | 706 |
| 15 | 52446137  | rs886041054 | GNB5   | mouse      | 617173 | 566 | 684 |
| 15 | 52416726  | rs773902879 | GNB5   | mouse      | 617173 | 45  | 21  |
| 15 | 52446136  | rs886041055 | GNB5   | mouse      | 617173 | 626 | 525 |
| 15 | 52446134  | rs766004901 | GNB5   | mouse      | 617173 | 210 | 348 |
| 15 | 52416814  | rs749597091 | GNB5   | mouse      | 617173 | 40  | 6   |
| 15 | 51696718  | rs764239923 | GLDN   | mouse      | 617194 | 7   | 342 |
| 15 | 51633976  | rs779432560 | GLDN   | mouse      | 617194 | 883 | 681 |
| 15 | 51696535  | rs539703340 | GLDN   | mouse      | 617194 | 644 | 136 |
| 15 | 51676090  | rs886041057 | GLDN   | mouse      | 617194 | 922 | 831 |
| 15 | 51696730  | rs368085516 | GLDN   | mouse      | 617194 | 441 | 215 |
| 19 | 54684489  | rs886041060 | MBOAT7 | mouse      | 617188 | 224 | 281 |
| 2  | 25973137  | rs886041070 | ASXL2  | mouse      | 617190 | 319 | 22  |
| 5  | 14290918  | .           | TRIO   | mouse      | 617061 | 868 | 155 |
| 10 | 99344567  | rs201803986 | PI4K2A | mouse      | 613616 | 90  | 52  |
| 10 | 99361646  | rs755562733 | PI4K2A | mouse      | 613616 | 52  | 41  |
| 10 | 99361646  | rs755562733 | PI4K2A | mouse      | 613616 | 37  | 7   |
| 10 | 99361676  | rs796052086 | PI4K2A | mouse      | 613616 | 9   | 5   |
| 10 | 99361747  | rs770050262 | PI4K2A | mouse      | 613616 | 85  | 53  |
| 11 | 112098994 | rs794726657 | BCO2   | mouse      | 261640 | 164 | 102 |
| 11 | 14316390  | rs113954997 | RRAS2  | mouse      | 167000 | 280 | 51  |
| 11 | 14316390  | rs113954997 | RRAS2  | mouse      | 167000 | 127 | 29  |
| 1  | 151789714 | rs774357869 | RORC   | mouse      | 616622 | 356 | 82  |
| 1  | 151789714 | rs774357869 | RORC   | mouse      | 616622 | 504 | 101 |

|    |           |             |         |            |        |      |      |
|----|-----------|-------------|---------|------------|--------|------|------|
| 1  | 160293229 | rs794727993 | COPA    | fish       | 616414 | 1    | 3    |
| 1  | 160293229 | rs794727993 | COPA    | fish       | 616414 | 1    | 2    |
| 11 | 6637744   | rs755445790 | TAF10   | mouse      | 204500 | 119  | 113  |
| 12 | 56749487  | rs281874770 | STAT2   | mouse      | 616636 | 542  | 542  |
| 12 | 56749487  | rs281874770 | STAT2   | mouse      | 616636 | 789  | 611  |
| 13 | 111329354 | rs557671802 | CARS2   | mouse      | 616672 | 951  | 444  |
| 13 | 111329354 | rs557671802 | CARS2   | mouse      | 616672 | 713  | 430  |
| 13 | 111335398 | rs727505361 | CARS2   | mouse      | 616672 | 486  | 559  |
| 13 | 111335398 | rs727505361 | CARS2   | mouse      | 616672 | 550  | 553  |
| 15 | 50544717  | rs267606861 | HDC     | mouse-fish | 137580 | 1    | 3    |
| 15 | 50544717  | rs267606861 | HDC     | mouse-fish | 137580 | 1    | 4    |
| 17 | 38907213  | rs766783183 | KRT25   | mouse      | 278150 | 8    | 172  |
| 17 | 38907213  | rs766783183 | KRT25   | mouse      | 278150 | 49   | 271  |
| 19 | 39074134  | rs193922886 | MAP4K1  | mouse      | 255320 | 165  | 135  |
| 2  | 227661632 | rs104893642 | IRS1    | mouse      | 125853 | 230  | 650  |
| 2  | 227661632 | rs104893642 | IRS1    | mouse      | 125853 | 184  | 416  |
| 4  | 103226211 | rs779241085 | SLC39A8 | mouse      | 616721 | 1065 | 298  |
| 4  | 103226211 | rs779241085 | SLC39A8 | mouse      | 616721 | 1159 | 316  |
| 4  | 103265723 | rs373562040 | SLC39A8 | mouse      | 616721 | 438  | 409  |
| 4  | 103265723 | rs373562040 | SLC39A8 | mouse      | 616721 | 223  | 435  |
| 4  | 5749953   | rs121908425 | CRMP1   | mouse      | 225500 | 65   | 1    |
| 5  | 74842932  | rs148960463 | POLK    | mouse      | 176807 | 187  | 139  |
| 5  | 74842932  | rs148960463 | POLK    | mouse      | 176807 | 601  | 202  |
| 5  | 74882880  | rs111584802 | POLK    | mouse      | 176807 | 794  | 382  |
| 5  | 74882880  | rs111584802 | POLK    | mouse      | 176807 | 1002 | 373  |
| 5  | 74886193  | rs770984846 | POLK    | mouse      | 176807 | 1081 | 1086 |
| 5  | 74886193  | rs770984846 | POLK    | mouse      | 176807 | 1484 | 1115 |
| 5  | 74892259  | rs863225457 | POLK    | mouse      | 176807 | 143  | 252  |
| 5  | 74892259  | rs863225457 | POLK    | mouse      | 176807 | 124  | 287  |
| 5  | 74892710  | rs863225456 | POLK    | mouse      | 176807 | 303  | 290  |
| 5  | 74892710  | rs863225456 | POLK    | mouse      | 176807 | 476  | 473  |
| 5  | 82400865  | rs587779351 | XRCC4   | mouse      | 262400 | 44   | 2    |
| 5  | 82554426  | rs797045016 | XRCC4   | mouse      | 616541 | 549  | 190  |
| 5  | 82554426  | rs797045016 | XRCC4   | mouse      | 616541 | 41   | 116  |

Prediction on variants for which no phenotype similarity could be computed based on human phenotypes.
